# Supplementary material for: Heart Structure-Specific Transcriptomic Atlas Reveals Conserved microRNA-mRNA Interactions
Source: PLoS One. 2013 Jan 2;8(1):e52442. doi: 10.1371/journal.pone.0052442 (PMC3534709; doi:10.1371/journal.pone.0052442)
Supplement: Table S2 — Rat cardiac structure enriched microRNAs. (XLS) [file pone.0052442.s009.xls]

## Sheet: Sheet1
Valves
microRNA mature name	id	Sequence	Fold enrichment	p-value
rno-miR-204	mirnaUID0307	TTCCCTTTGTCATCCTATGCCT	17.9374	0.00397174
rno-miR-31	mirnaUID1686	AGGCAAGATGCTGGCATAGCTGT	17.9324	1.80607e-06
rno-miR-3554	mirnaUID1040	CTATGCCAGCATCTTGCCT	17.6806	1.07969e-06
mmu-miR-5109	mirnaUID0403	TGTTGCGGACCAGGGGAATCCGA	7.31359	1.55579e-10
rno-miR-3588	mirnaUID2671	TCACAAGTTAGGGTCTCAGGGA	6.42366	0.0164024
rno-miR-125b-5p	mirnaUID2699	TCCCTGAGACCCTAACTTGTGA	6.41545	0.016449
rno-miR-320	mirnaUID0965	AAAAGCTGGGTTGAGAGGGCGA	5.13746	0.0379124
mmu-miR-744	mirnaUID0939	TGCGGGGCTAGGGCTAACAGCA	4.90135	0.00683586
rno-miR-140*	mirnaUID2487	TACCACAGGGTAGAACCACGG	4.83911	0.00522285
rno-let-7b	mirnaUID1072	TGAGGTAGTAGGTTGTGTGGTT	3.71293	0.0489162
rno-miR-328a	mirnaUID1067	CTGGCCCTCTCTGCCCTTCCGT	3.59064	0.00840198
rno-miR-127	mirnaUID0088	TCGGATCCGTCTGAGCTTGGCT	3.20915	0.00174953
rno-miR-10b	mirnaUID2476	TACCCTGTAGAACCGAATTTGTG	3.13521	0.00174809
rno-let-7c	mirnaUID1210	TGAGGTAGTAGGTTGTATGGTT	3.06888	0.034429
rno-miR-99b	mirnaUID0532	CACCCGTAGAACCGACCTTGCG	3.00713	0.00424909
rno-miR-423*	mirnaUID2095	TGAGGGGCAGAGAGCGAGACTTTT	2.939	0.0435606
rno-miR-497	mirnaUID0236	CAGCAGCACACTGTGGTTTGTA	2.77657	0.0427926
rno-miR-199a-3p	mirnaUID2023	ACAGTAGTCTGCACATTGGTTA	2.75963	0.00010392
mmu-miR-199b	mirnaUID2023	ACAGTAGTCTGCACATTGGTTA	2.75013	0.000102717
rno-miR-125a-5p	mirnaUID0109	TCCCTGAGACCCTTTAACCTGTGA	2.71839	0.0243571
rno-miR-3596c	mirnaUID1636	ACTATACAACCTCCTACCTCA	2.51111	0.00677901
rno-let-7e	mirnaUID2686	TGAGGTAGGAGGTTGTATAGTT	2.50947	0.00689044
rno-miR-434	mirnaUID0606	TTTGAACCATCACTCGACTCCT	2.29198	0.000495117
rno-miR-3543	mirnaUID2716	CAGGAGTCGAGTGATGGTTCAAA	2.29198	0.000495117
mmu-miR-434-3p	mirnaUID0606	TTTGAACCATCACTCGACTCCT	2.29198	0.000495117
rno-miR-23b	mirnaUID0633	ATCACATTGCCAGGGATTACC	2.28802	0.00098843
Myocardium
microRNA mature name	id	Sequence	Fold enrichment	p-value
rno-miR-208b-3p	mirnaUID0997	ATAAGACGAACAAAAGGTTTGT	30.3744	1.52315e-06
rno-miR-499	mirnaUID1007	TTAAGACTTGCAGTGATGTTT	14.4209	1.75389e-11
mmu-miR-1a	mirnaUID0152	TGGAATGTAAAGAAGTATGTAT	3.75678	0.000318369
mmu-miR-133a*	mirnaUID2046	AGCTGGTAAAATGGAACCAAAT	3.72603	0.000648124
rno-miR-133a	mirnaUID0106	TTTGGTCCCCTTCAACCAGCTG	2.7839	0.00236192
rno-miR-3582	mirnaUID1365	CAGCTGGTTGAAGGGGACCAA	2.78188	0.00238321
mmu-miR-149	mirnaUID2194	TCTGGCTCCGTGTCTTCACTCCC	2.70338	3.18146e-06
rno-miR-133b	mirnaUID2652	TTTGGTCCCCTTCAACCAGCTA	2.68428	0.00239989
rno-miR-322	mirnaUID0573	CAGCAGCAATTCATGTTTTGGA	2.55429	0.0003797
rno-miR-143	mirnaUID0897	TGAGATGAAGCACTGTAGCTCA	2.43594	6.53361e-05
rno-miR-150	mirnaUID1542	TCTCCCAACCCTTGTACCAGTG	2.39924	0.000253975
rno-miR-30e*	mirnaUID1498	CTTTCAGTCGGATGTTTACAGC	2.3536	0.00112674
rno-miR-450a	mirnaUID2119	TTTTGCGATGTGTTCCTAATGT	2.07124	0.00244311
rno-miR-30e	mirnaUID0677	TGTAAACATCCTTGACTGGAAG	2.03794	0.0127352
rno-miR-3567	mirnaUID1032	TACCAAAAGTAATAATGTGCTG	2.02827	0.00030223
Atria
microRNA mature name	id	Sequence	Fold enrichment	p-value
rno-miR-31	mirnaUID1686	AGGCAAGATGCTGGCATAGCTGT	7.41449	9.62851e-05
rno-miR-3554	mirnaUID1040	CTATGCCAGCATCTTGCCT	7.40986	9.18691e-05
rno-miR-127	mirnaUID0088	TCGGATCCGTCTGAGCTTGGCT	3.95324	0.00327507
rno-miR-490	mirnaUID0503	CAACCTGGAGGACTCCATGCTG	3.0221	2.17137e-09
rno-miR-434	mirnaUID0606	TTTGAACCATCACTCGACTCCT	2.95369	0.00642732
